# Supplementary material for: Mortality among Hospitalized Dengue Patients with Comorbidities in Mexico, Brazil, and Colombia
Source: PubMed Central journal article supplement (PMC8274750; doi:10.4269/ajtmh.20-1163), 2021-05-10

## Supplemental materials

**Table S1.** ICD10 code definitions for comorbidity groups [International Statistical Classification of Diseases and Related Health Problems 10th Revision (ICD-10)-2014-WHO Version for 2014. <http://apps.who.int/classifications/icd10/browse/2014/en>]

| Comorbidity Group              | ICD10 Code                      | Description                                                                               |
|--------------------------------|---------------------------------|-------------------------------------------------------------------------------------------|
| <b>Diabetes</b>                | E10                             | Insulin-dependent diabetes mellitus                                                       |
|                                | E11                             | Non-insulin-dependent diabetes mellitus                                                   |
|                                | E13                             | Other specified diabetes mellitus                                                         |
|                                | E14                             | Unspecified diabetes mellitus                                                             |
| <b>HIV</b>                     | B20                             | Human immunodeficiency virus [HIV] disease resulting in infectious and parasitic diseases |
|                                | B22                             | Human immunodeficiency virus [HIV] disease resulting in other specified diseases          |
|                                | B23                             | Human immunodeficiency virus [HIV] disease resulting in other conditions                  |
|                                | B24                             | Unspecified human immunodeficiency virus [HIV] disease                                    |
| <b>Heart failure</b>           | I50                             | Heart failure                                                                             |
| <b>Hypertension</b>            | I10                             | Essential (primary) hypertension                                                          |
|                                | I11                             | Hypertensive heart disease                                                                |
|                                | I12                             | Hypertensive renal disease                                                                |
|                                | I15                             | Secondary hypertension                                                                    |
| <b>Ischaemic heart disease</b> | I20                             | Angina pectoris                                                                           |
|                                | I21                             | Acute myocardial infarction                                                               |
|                                | I24                             | Other acute ischaemic heart diseases                                                      |
|                                | I25                             | Chronic ischaemic heart disease                                                           |
| <b>Dyslipidemia</b>            | E78                             | Disorders of lipoprotein metabolism and other lipidaemias                                 |
| <b>Obesity</b>                 | E66                             | Obesity                                                                                   |
| <b>Pulmonary disorders</b>     | J12                             | Viral pneumonia, not elsewhere classified                                                 |
|                                | J15                             | Bacterial pneumonia, not elsewhere classified                                             |
|                                | J18                             | Pneumonia, organism unspecified                                                           |
|                                | J21                             | Acute bronchiolitis                                                                       |
|                                | J40                             | Bronchitis, not specified as acute or chronic                                             |
|                                | J44                             | Other chronic obstructive pulmonary disease                                               |
|                                | J45                             | Asthma                                                                                    |
|                                | J90                             | Pleural effusion, not elsewhere classified                                                |
|                                | J96                             | Respiratory failure, not elsewhere classified                                             |
|                                | <b>Renal disease or failure</b> | N10                                                                                       |
| N11                            |                                 | Chronic tubulo-interstitial nephritis                                                     |
| N12                            |                                 | Tubulo-interstitial nephritis, not specified as acute or chronic                          |
| N13                            |                                 | Obstructive and reflux uropathy                                                           |
| N18                            |                                 | Chronic kidney disease                                                                    |
| N17                            |                                 | Acute renal failure                                                                       |
| N19                            | Unspecified kidney failure      |                                                                                           |

| <b>Comorbidity Group</b>              | <b>ICD10 Code</b> | <b>Description</b>                                 |
|---------------------------------------|-------------------|----------------------------------------------------|
| <b>Stroke</b>                         | I64               | Stroke, not specified as haemorrhage or infarction |
| <b>Urinary disorders</b>              | N39               | Other disorders of urinary system                  |
| <b>Infectious disease<sup>#</sup></b> | A00–A99           | Infectious diseases (excluding dengue A90/91)      |

<sup>#</sup>See Table S5 for the breakdown of the most frequent infectious disease codes.

**Table S2.** Summary of dengue cases for Mexico (SAEH 2008–2014)

|                                           | Cases  | Severe Dengue | ICU Admission | In-hospital deaths | All dengue cases (deaths) |              |           |           | Severe dengue cases (A91)(deaths) |             |           |           |
|-------------------------------------------|--------|---------------|---------------|--------------------|---------------------------|--------------|-----------|-----------|-----------------------------------|-------------|-----------|-----------|
|                                           |        |               |               |                    | 0–8                       | 9–45         | 46–60     | ≥61       | 0–8                               | 9–45        | 46–60     | ≥61       |
| <b>All dengue cases<sup>1</sup></b>       | 68,194 | 23,837        | 122           | 267                | 7311 (34)                 | 50220 (142)  | 6887 (37) | 3776 (54) | 1972 (20)                         | 17,951 (90) | 2569 (23) | 1345 (26) |
| <b>Dengue only<sup>2</sup></b>            | 52,682 | 18,784        | 62            | 69                 | 5426 (9)                  | 40,084 (41)  | 4894 (9)  | 2278 (10) | 1465 (6)                          | 14,528 (24) | 1928 (9)  | 863 (5)   |
| <b>Dengue + any diagnosis<sup>3</sup></b> | 15,512 | 5053          | 60            | 198                | 1885 (25)                 | 10,136 (101) | 1993 (28) | 1498 (44) | 507 (14)                          | 3423 (66)   | 641 (14)  | 482 (21)  |
| <b>Dengue + comorbidity<sup>4</sup></b>   | 5719   | 1672          | 19            | 107                | 618 (13)                  | 2927 (50)    | 1206 (16) | 968 (28)  | 152 (9)                           | 865 (28)    | 355 (8)   | 300 (13)  |
| Infectious diseases                       | 1550   | 402           | 3             | 36                 | 287 (7)                   | 988 (23)     | 161 (2)   | 114 (4)   | 55 (5)                            | 283 (11)    | 35 (1)    | 29 (1)    |
| Diabetes                                  | 1504   | 505           | 3             | 20                 | 5                         | 466 (4)      | 621 (4)   | 412 (12)  | 1                                 | 161 (2)     | 198 (2)   | 145 (6)   |
| Urinary disorders                         | 1426   | 350           | 1             | 7                  | 173 (1)                   | 858 (2)      | 223 (1)   | 172 (3)   | 45 (1)                            | 216         | 40 (1)    | 49 (3)    |
| Hypertension                              | 950    | 323           | 4             | 9                  | 2 (1)                     | 217 (1)      | 355 (1)   | 376 (6)   |                                   | 73 (1)      | 118 (1)   | 132 (2)   |
| Pulmonary disorders                       | 573    | 187           | 9             | 31                 | 155 (4)                   | 260 (14)     | 63 (5)    | 95 (8)    | 52 (3)                            | 93 (8)      | 17 (2)    | 25 (2)    |
| Renal disease or failure                  | 440    | 119           | 3             | 23                 | 23 (1)                    | 246 (13)     | 84 (3)    | 87 (6)    | 2 (1)                             | 68 (12)     | 24 (1)    | 25 (3)    |
| HIV                                       | 113    | 41            |               | 6                  | 2                         | 95 (6)       | 16        |           |                                   | 36 (2)      | 5         |           |
| Obesity                                   | 98     | 33            |               | 2                  | 4                         | 73 (2)       | 10        | 11        | 2                                 | 22 (2)      | 5         | 4         |
| Heart failure                             | 47     | 13            |               | 1                  |                           | 10 (1)       | 7         | 30        |                                   | 2           | 2         | 9         |
| Dyslipidemia                              | 41     | 16            |               |                    | 1                         | 23           | 11        | 6         |                                   | 10          | 4         | 2         |
| Ischemic heart disease                    | 33     | 11            |               | 5                  |                           | 2            | 12 (3)    | 19 (2)    |                                   |             | 5 (2)     | 6 (2)     |
| Atrial fibrillation                       | 12     | 7             |               | 1                  |                           | 2            | 3         | 7 (1)     |                                   | 1           | 3         | 3 (1)     |
| Stroke                                    | 5      | 2             |               | 1                  |                           |              |           | 5 (1)     |                                   |             |           | 2 (1)     |

<sup>1</sup>All cases with dengue as principal or secondary diagnosis.

<sup>2</sup>Cases with dengue as principal diagnosis and no secondary diagnoses recorded.

<sup>3</sup>Cases with dengue as principal or secondary diagnosis and at least one other diagnosis recorded.

<sup>4</sup>Cases with dengue as principal or secondary diagnosis and at least one comorbidity defined in Table S1 recorded (subset of <sup>3</sup> excluding dengue symptoms and other codes not categorized).

**Table S3.** Summary of dengue cases for Brazil (SIHSUS 2008-2015)

| Group                                     | Cases   | Severe Dengue | ICU Admission | In-hospital deaths | All dengue cases (deaths) |               |              |              | Severe dengue cases (A91)(deaths) |              |            |            |
|-------------------------------------------|---------|---------------|---------------|--------------------|---------------------------|---------------|--------------|--------------|-----------------------------------|--------------|------------|------------|
|                                           |         |               |               |                    | 0-8                       | 9-45          | 46-60        | ≥61          | 0-8                               | 9-45         | 46-60      | ≥61        |
| <b>All dengue cases<sup>1</sup></b>       | 532,821 | 27,124        | 4536          | 2698               | 73,839 (237)              | 324,240 (964) | 74,460 (529) | 60,282 (968) | 6005 (153)                        | 15,843 (465) | 3222 (203) | 2054 (231) |
| <b>Dengue only<sup>2</sup></b>            | 522,111 | 26,398        | 4133          | 2347               | 72,304 (220)              | 318,819 (860) | 72,742 (460) | 58,246 (807) | 5928 (142)                        | 15,429 (422) | 3084 (177) | 1957 (202) |
| <b>Dengue + any diagnosis<sup>3</sup></b> | 10,710  | 726           | 403           | 351                | 1535 (17)                 | 5421 (104)    | 1718 (69)    | 2036 (161)   | 77 (11)                           | 414 (43)     | 138 (26)   | 97 (29)    |
| <b>Dengue + comorbidity<sup>4</sup></b>   | 4004    | 283           | 202           | 198                | 559 (9)                   | 1604 (50)     | 760 (41)     | 1081 (98)    | 40 (5)                            | 137 (21)     | 63 (13)    | 43 (14)    |
| Infectious diseases                       | 1294    | 85            | 66            | 75                 | 274 (7)                   | 650 (25)      | 181 (18)     | 189 (25)     | 17 (4)                            | 48 (10)      | 13 (5)     | 7 (5)      |
| Pulmonary disorders                       | 865     | 75            | 56            | 67                 | 228                       | 350 (13)      | 92 (12)      | 195 (42)     | 19                                | 34 (7)       | 10 (3)     | 12 (6)     |
| Hypertension                              | 595     | 45            | 10            | 10                 | 2 (1)                     | 116           | 190          | 287 (9)      |                                   | 14           | 24         | 7 (1)      |
| Urinary disorders                         | 468     | 8             | 2             | 2                  | 33                        | 257 (1)       | 84           | 94 (1)       | 1                                 | 7            |            |            |
| Diabetes                                  | 295     | 25            | 13            | 7                  | 3                         | 61 (2)        | 102 (3)      | 129 (2)      | 1                                 | 4 (1)        | 9 (2)      | 11         |
| Renal disease or failure                  | 191     | 23            | 29            | 17                 | 14 (1)                    | 80 (6)        | 43 (4)       | 54 (6)       | 2 (1)                             | 13 (2)       | 5 (3)      | 3 (1)      |
| HIV                                       | 113     | 13            | 0             | 1                  | 4                         | 70 (1)        | 32           | 7            |                                   | 11           | 2          |            |
| Heart failure                             | 104     | 5             | 17            | 14                 |                           | 8 (1)         | 20 (3)       | 76 (10)      |                                   | 3            |            | 2 (1)      |
| Ischemic heart disease                    | 29      |               | 4             | 3                  |                           | 1             | 6 (1)        | 22 (2)       |                                   |              |            |            |
| Stroke                                    | 19      | 2             | 5             | 2                  |                           | 3 (1)         | 3            | 13 (1)       |                                   | 1 (1)        |            | 1          |
| Atrial fibrillation                       | 13      |               |               |                    |                           |               | 4            | 9            |                                   |              |            |            |
| Obesity                                   | 12      | 2             |               |                    |                           | 7             | 1            | 4            |                                   | 2            |            |            |
| Dyslipidemia                              | 6       |               |               |                    | 1                         | 1             | 2            | 2            |                                   |              |            |            |

<sup>1</sup>All cases with dengue as principal or secondary diagnosis.

<sup>2</sup>Cases with dengue as principal diagnosis and no secondary diagnoses recorded.

<sup>3</sup>Cases with dengue as principal or secondary diagnosis and at least one other diagnosis recorded.

<sup>4</sup>Cases with dengue as principal or secondary diagnosis and at least one comorbidity defined in Table S1 recorded (subset of <sup>3</sup> excluding dengue symptoms and other codes not categorized).

**Table S4.** Summary of dengue cases for Colombia (RIPS 2009-2017)

| Group                                     | Cases  | Severe Dengue | In-hospital deaths | All dengue cases (deaths) |             |           |           | Severe dengue cases (A91) (deaths) |           |          |          |
|-------------------------------------------|--------|---------------|--------------------|---------------------------|-------------|-----------|-----------|------------------------------------|-----------|----------|----------|
|                                           |        |               |                    | 0–8                       | 9–45        | 46–60     | ≥61       | 0–8                                | 9–45      | 46–60    | ≥61      |
| <b>All dengue cases<sup>1</sup></b>       | 77,821 | 14,242        | 260                | 21,408 (60)               | 45,112 (88) | 6354 (36) | 4947 (76) | 4341 (49)                          | 8278 (53) | 972 (22) | 651 (30) |
| <b>Dengue only<sup>2</sup></b>            | 69,341 | 12,722        | 153                | 19,005 (44)               | 40,824 (59) | 5574 (16) | 3938 (34) | 3916 (35)                          | 7429 (35) | 858 (10) | 519 (16) |
| <b>Dengue + any diagnosis<sup>3</sup></b> | 8480   | 1520          | 107                | 2403 (16)                 | 4288 (29)   | 780 (20)  | 1009 (42) | 425 (14)                           | 849 (18)  | 114 (12) | 132 (14) |
| <b>Dengue + comorbidity<sup>4</sup></b>   | 2979   | 474           | 67                 | 848 (5)                   | 1121 (16)   | 373 (14)  | 637 (32)  | 133 (4)                            | 208 (10)  | 52 (8)   | 81 (7)   |
| Infectious diseases                       | 1039   | 148           | 23                 | 364 (3)                   | 481 (4)     | 99 (6)    | 95 (10)   | 46 (3)                             | 77 (4)    | 12 (3)   | 13 (3)   |
| Pulmonary disorders                       | 768    | 186           | 26                 | 378 (3)                   | 213 (8)     | 63 (6)    | 114 (9)   | 82 (2)                             | 71 (5)    | 11 (4)   | 22 (4)   |
| Urinary disorders                         | 677    | 61            | 6                  | 128                       | 317         | 82 (1)    | 150 (5)   | 11                                 | 34        | 9 (1)    | 7        |
| Hypertension                              | 369    | 49            | 9                  | 3                         | 57 (1)      | 89 (2)    | 220 (6)   | 1                                  | 14        | 11       | 23       |
| Diabetes                                  | 213    | 37            | 2                  | 2                         | 22          | 68 (1)    | 121 (1)   |                                    | 4         | 11       | 22       |
| Renal disease or failure                  | 81     | 13            | 7                  | 3                         | 30          | 11 (2)    | 37 (5)    |                                    | 4         | 1 (1)    | 8 (3)    |
| Obesity                                   | 49     | 13            |                    | 8                         | 20          | 14        | 7         | 1                                  | 8         | 4        |          |
| Ischemic heart disease                    | 37     | 8             | 4                  |                           | 6           | 10        | 21 (4)    |                                    | 1         | 2        | 5 (1)    |
| Heart failure                             | 33     | 5             | 4                  |                           | 3 (1)       | 6         | 24 (3)    |                                    | 1 (1)     |          | 4 (1)    |
| HIV                                       | 32     | 5             | 3                  | 1                         | 26 (3)      | 4         | 1         |                                    | 4 (1)     | 1        |          |
| Dyslipidemia                              | 14     |               |                    | 2                         | 1           | 6         | 5         |                                    |           |          |          |
| Atrial fibrillation                       | 12     |               | 1                  |                           | 1           |           | 11 (1)    |                                    |           |          |          |

<sup>1</sup>All cases with dengue as principal or secondary diagnosis. In RIPS database a distinct hospitalization episode may consist of multiple RIPS records; 91,634 raw dengue records were identified as principal or secondary. These raw records were aggregated by identifying distinct hospitalization episodes for individual patients, irrespective of whether the episode was across multiple hospitals or departments. Of the 91,634 raw records, there were 79,910 distinct patient episodes based on overlapping admission and discharge dates. Of these, 2,089 episodes were excluded from the analysis due to inconsistent reporting of key attributes (age, sex, diagnosis codes). Thus, 77,821 hospitalized dengue cases were extracted and included in analysis.

<sup>2</sup>Cases with dengue as principal diagnosis and no secondary diagnoses recorded.

<sup>3</sup>Cases with dengue as principal or secondary diagnosis and at least one other diagnosis recorded.

<sup>4</sup>Cases with dengue as principal or secondary diagnosis and at least one comorbidity defined in Table S1 recorded (subset of <sup>3</sup> excluding dengue symptoms and other codes not categorized).

**Table S5.** Frequency of the top (accounting for 95% of codes) ICD-10 codes included in the infectious disease A00–A99 comorbidity category by country

| <b>ICD10</b>                                                                                | <b>Description</b>                                                          | <b>BRA</b> | <b>COL</b> | <b>MEX</b> | <b>Total</b> | <b>Cumulative %</b> |
|---------------------------------------------------------------------------------------------|-----------------------------------------------------------------------------|------------|------------|------------|--------------|---------------------|
| A09                                                                                         | Other gastroenteritis and colitis of infectious and unspecified origin      | 388        | 543        | 628        | 1559         | 39%                 |
| A02                                                                                         | Other salmonella infections                                                 | 49         | 12         | 385        | 446          | 51%                 |
| A92                                                                                         | Other mosquito-borne viral fevers                                           | 237        | 125        | 56         | 418          | 61%                 |
| A27                                                                                         | Leptospirosis                                                               | 65         | 114        | 116        | 295          | 68%                 |
| A41                                                                                         | Other sepsis                                                                | 95         | 90         | 66         | 251          | 75%                 |
| A04                                                                                         | Other bacterial intestinal infections                                       | 220        | 7          | 3          | 230          | 81%                 |
| A01                                                                                         | Typhoid and paratyphoid fevers                                              | 1          | 12         | 170        | 183          | 85%                 |
| A49                                                                                         | Bacterial infection of unspecified site                                     | 63         | 29         | 8          | 100          | 88%                 |
| A06                                                                                         | Amebiasis                                                                   | 4          | 24         | 54         | 82           | 90%                 |
| A08                                                                                         | Viral and other specified intestinal infections                             | 29         | 20         | 21         | 70           | 92%                 |
| A68                                                                                         | Relapsing fevers                                                            | 11         | 45         | 6          | 62           | 93%                 |
| A16                                                                                         | Respiratory tuberculosis, not confirmed bacteriologically or histologically | 2          | 4          | 25         | 31           | 94%                 |
| A46                                                                                         | Erysipelas                                                                  | 15         | 8          | 8          | 31           | 95%                 |
| A77                                                                                         | Spotted fever [tick-borne rickettsioses]                                    | 15         | 4          | 7          | 26           | 95%                 |
| <b>Total reported infectious disease codes for hospitalised dengue episodes<sup>#</sup></b> |                                                                             | 1294       | 1066       | 1609       | 3969         |                     |
| <b>Total distinct episodes</b>                                                              |                                                                             | 1294       | 1039       | 1550       | 3883         |                     |

BRA, Brazil; COL, Colombia; MEX, Mexico.

<sup>#</sup>It is possible for multiple comorbidity codes to be reported in COL and MEX for a single dengue episode so the sum of the counts of infectious disease codes is higher than the number of distinct episodes (as indicated in the column totals).

**Table S6.** Case fatality rates and relative mortality rate in patients with hospitalized dengue and comorbidities

| Comorbidity              | Mexico           |         |                 |     | Brazil           |         |                 |     | Colombia         |         |                 |     |
|--------------------------|------------------|---------|-----------------|-----|------------------|---------|-----------------|-----|------------------|---------|-----------------|-----|
|                          | Deaths/<br>Cases | CFR (%) | RMR<br>(95% CI) | P   | Deaths/<br>Cases | CFR (%) | RMR<br>(95% CI) | P   | Deaths/<br>Cases | CFR (%) | RMR<br>(95% CI) | P   |
| <b>0–8 years</b>         |                  |         |                 |     |                  |         |                 |     |                  |         |                 |     |
| Renal disease or failure | 1/23             | 4.3     | 26 (3–199)      | *   | 1/14             | 7.1     | 23 (4–156)      | *   |                  |         |                 |     |
| Pulmonary disorders      | 4/155            | 2.6     | 16 (5–50)       | *** | 0/228            |         |                 |     |                  |         |                 |     |
| Infectious diseases      | 7/287            | 2.4     | 15 (6–39)       | *** | 7/274            | 2.6     | 8 (4–18)        | *** |                  |         |                 |     |
| <b>9–45 years</b>        |                  |         |                 |     |                  |         |                 |     |                  |         |                 |     |
| Heart failure            | 1/10             | 10.0    | 98 (15–644)     | *   | 1/8              | 12.5    | 46 (8–290)      | *   |                  |         |                 |     |
| HIV                      | 6/95             | 6.3     | 62 (27–142)     | *** | 1/70             |         |                 | ns  | 3/26             | 11.5    | 80 (27–239)     | *** |
| Pulmonary disorders      | 14/260           | 5.4     | 53 (29–95)      | *** | 13/350           | 3.7     | 14 (8–24)       | *** | 8/213            | 3.8     | 26 (13–54)      | *** |
| Renal disease or failure | 13/246           | 5.3     | 52 (28–95)      | *** | 6/80             | 7.5     | 28 (13–60)      | *** |                  |         |                 |     |
| Obesity                  | 2/73             | 2.7     | 27 (7–109)      | **  | 0/7              |         |                 |     |                  |         |                 |     |
| Infectious diseases      | 23/988           | 2.3     | 23 (14–38)      | *** | 25/650           | 3.8     | 14 (10–21)      | *** | 4/481            | 0.8     | 6 (2–16)        | **  |
| Diabetes                 | 4/466            | 0.9     | 8 (3–23)        | **  | 2/61             | 2.9     | 12 (3–48)       | *   |                  |         |                 |     |
| <b>46–60 years</b>       |                  |         |                 |     |                  |         |                 |     |                  |         |                 |     |
| Ischemic heart disease   | 3/12             | 25.0    | 136 (42–441)    | *** | 1/6              | 16.7    | 26 (4–158)      | *   |                  |         |                 |     |
| Pulmonary disorders      | 5/63             | 7.9     | 43 (15–125)     | *** | 12/92            | 13.0    | 21 (12–35)      | *** | 6/63             | 9.5     | 33 (13–82)      | *** |
| Heart failure            | 0/7              |         |                 |     | 3/20             | 15.0    | 24 (8–68)       | *** |                  |         |                 |     |
| Renal disease or failure | 3/84             | 3.6     | 19 (5–70)       | *** | 4/43             | 9.3     | 15 (6–38)       | *** | 2/11             | 18.2    | 63 (16–243)     | *** |
| Infectious diseases      | 2/161            | 1.2     | 7 (1–31)        | *   | 18/181           | 9.9     | 16 (10–25)      | *** | 6/99             | 6.1     | 21 (8–53)       | *** |
| Diabetes                 | 4/621            | 0.6     | 4 (1–11)        | *   | 3/102            | 2.9     | 5 (2–14)        | *   |                  |         |                 |     |
| Hypertension             |                  |         |                 |     |                  |         |                 |     | 2/89             | 2.2     | 8 (2–34)        | *   |
| <b>≥61 years</b>         |                  |         |                 |     |                  |         |                 |     |                  |         |                 |     |
| Stroke                   | 1/5              | 20.0    | 46 (7–292)      | *   | 1/13             |         |                 | ns  |                  |         |                 |     |
| Atrial fibrillation      | 1/7              | 14.3    | 33 (5–221)      | *   | 0/9              |         |                 |     |                  |         |                 |     |
| Ischemic heart disease   | 2/19             | 10.5    | 24 (6–102)      | **  | 2/22             | 9.1     | 7 (2–25)        | *   | 4/21             | 19.0    | 22 (9–57)       | *** |
| Pulmonary disorders      | 8/95             | 8.4     | 19 (8–48)       | *** | 42/195           | 21.5    | 16 (12–21)      | *** | 9/114            | 7.9     | 9 (4–19)        | *** |

|                          |        |     |           |     |        |      |           |     |       |      |           |     |
|--------------------------|--------|-----|-----------|-----|--------|------|-----------|-----|-------|------|-----------|-----|
| Renal disease or failure | 6/87   | 6.9 | 16 (6–42) | *** | 6/54   | 11.1 | 8 (4–17)  | *** | 5/37  | 13.5 | 16 (6–38) | *** |
| Infectious diseases      | 4/114  | 3.5 | 8 (3–25)  | **  | 25/189 | 13.2 | 10 (7–14) | *** | 10/95 | 10.5 | 12 (6–24) | *** |
| Heart failure            | 0/30   |     |           |     | 10/76  | 13.2 | 9 (5–17)  | *** | 3/24  | 12.5 | 14 (5–44) | **  |
| Diabetes                 | 12/412 | 2.9 | 7 (3–15)  | *** | 2/129  |      |           | ns  |       |      |           |     |
| Hypertension             | 6/376  | 1.6 | 4 (1–10)  | *   | 9/287  | 3.1  | 2 (1–4)   | *   | 6/220 | 2.7  | 3 (1–7)   | *   |
| Urinary disorders        |        |     |           |     |        |      |           |     | 5/150 | 3.3  | 4 (2–10)  | *   |

Comorbidities only reported for age groups with at least 5 cases and 1 death, and  $p < 0.05$  from the Fisher's exact test.

CFR, case fatality rate; RMR, relative mortality rate for dengue with comorbidity vs dengue alone.

Significance for the RMR of dengue with comorbidity vs dengue alone: \*\*\*  $p < 0.001$ ; \*\*  $p < 0.01$ ; \*  $p < 0.05$  (Fisher's exact test).



**Figure S1. Prevalence of comorbidities in hospitalized dengue cases compared to non-dengue cases in Mexico (A), Brazil (B) and Colombia (C), grouped by age and comorbidity category.** Mexico (N=15,512 dengue, N=7.35 million non-dengue), Brazil (N=10,710 dengue, N=11.8 million non-dengue), Colombia (N=8480 dengue, N=1.40 million non-dengue). Only comorbidities with relative prevalence  $> \times 1$  and  $p < 0.01$  [Fisher's exact test] compared to non-dengue cases are shown. Relative prevalence of comorbidities in dengue cases compared the non-dengue cases is indicated above the dengue cases bar. There were no dengue comorbidities with relative prevalence  $> \times 1$  and  $p < 0.01$  compared to non-dengue cases in those aged 0–8 years in Colombia.

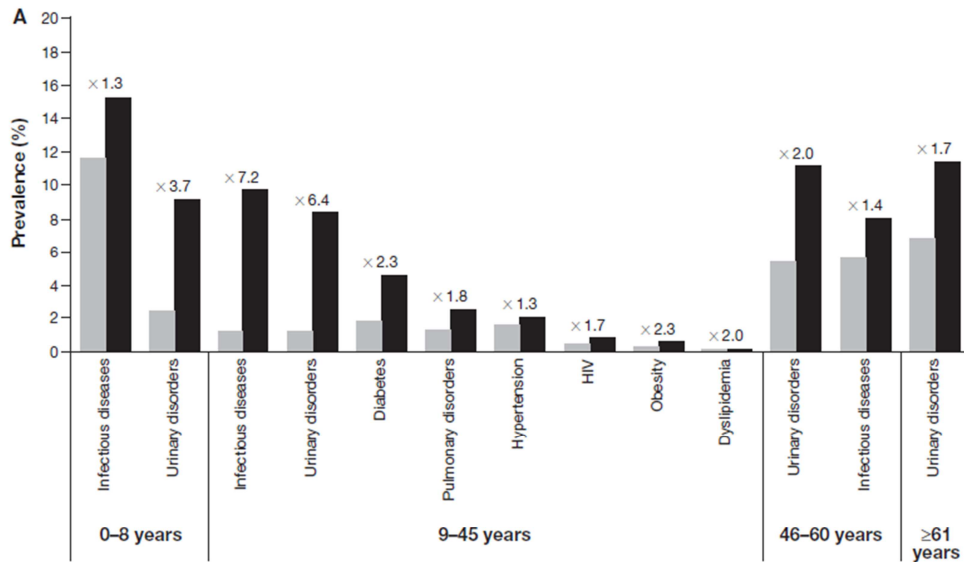

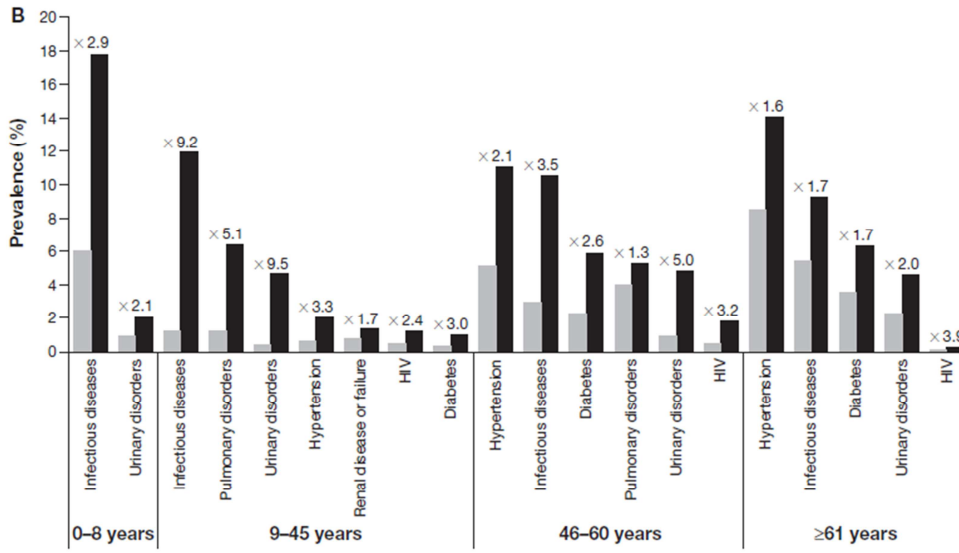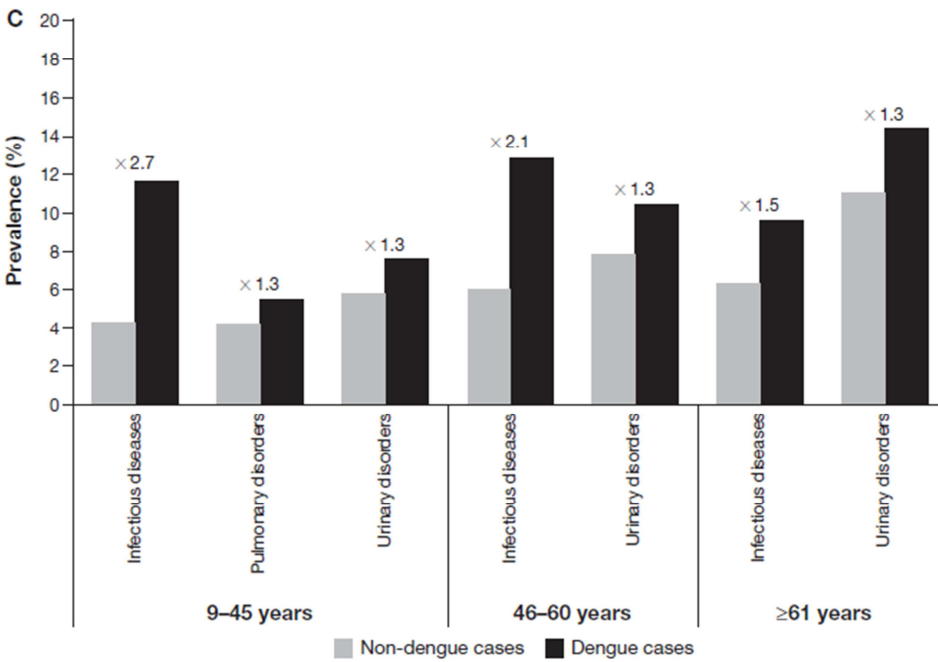

Supplement: tpmd201163.SD1.pdf [file tpmd201163.SD1.pdf]
